# Supplementary material for: Insights into the signal transduction pathways of mouse lung type II cells revealed by transcription factor profiling in the transcriptome
Source: PubMed Central journal article supplement (PMC6459171; doi:10.5808/gi.2019.17.1.e8), 2019-03-31
Supplement: gi-2019-17-1-e8-suppl2.pdf [file gi-2019-17-1-e8-suppl2.pdf]

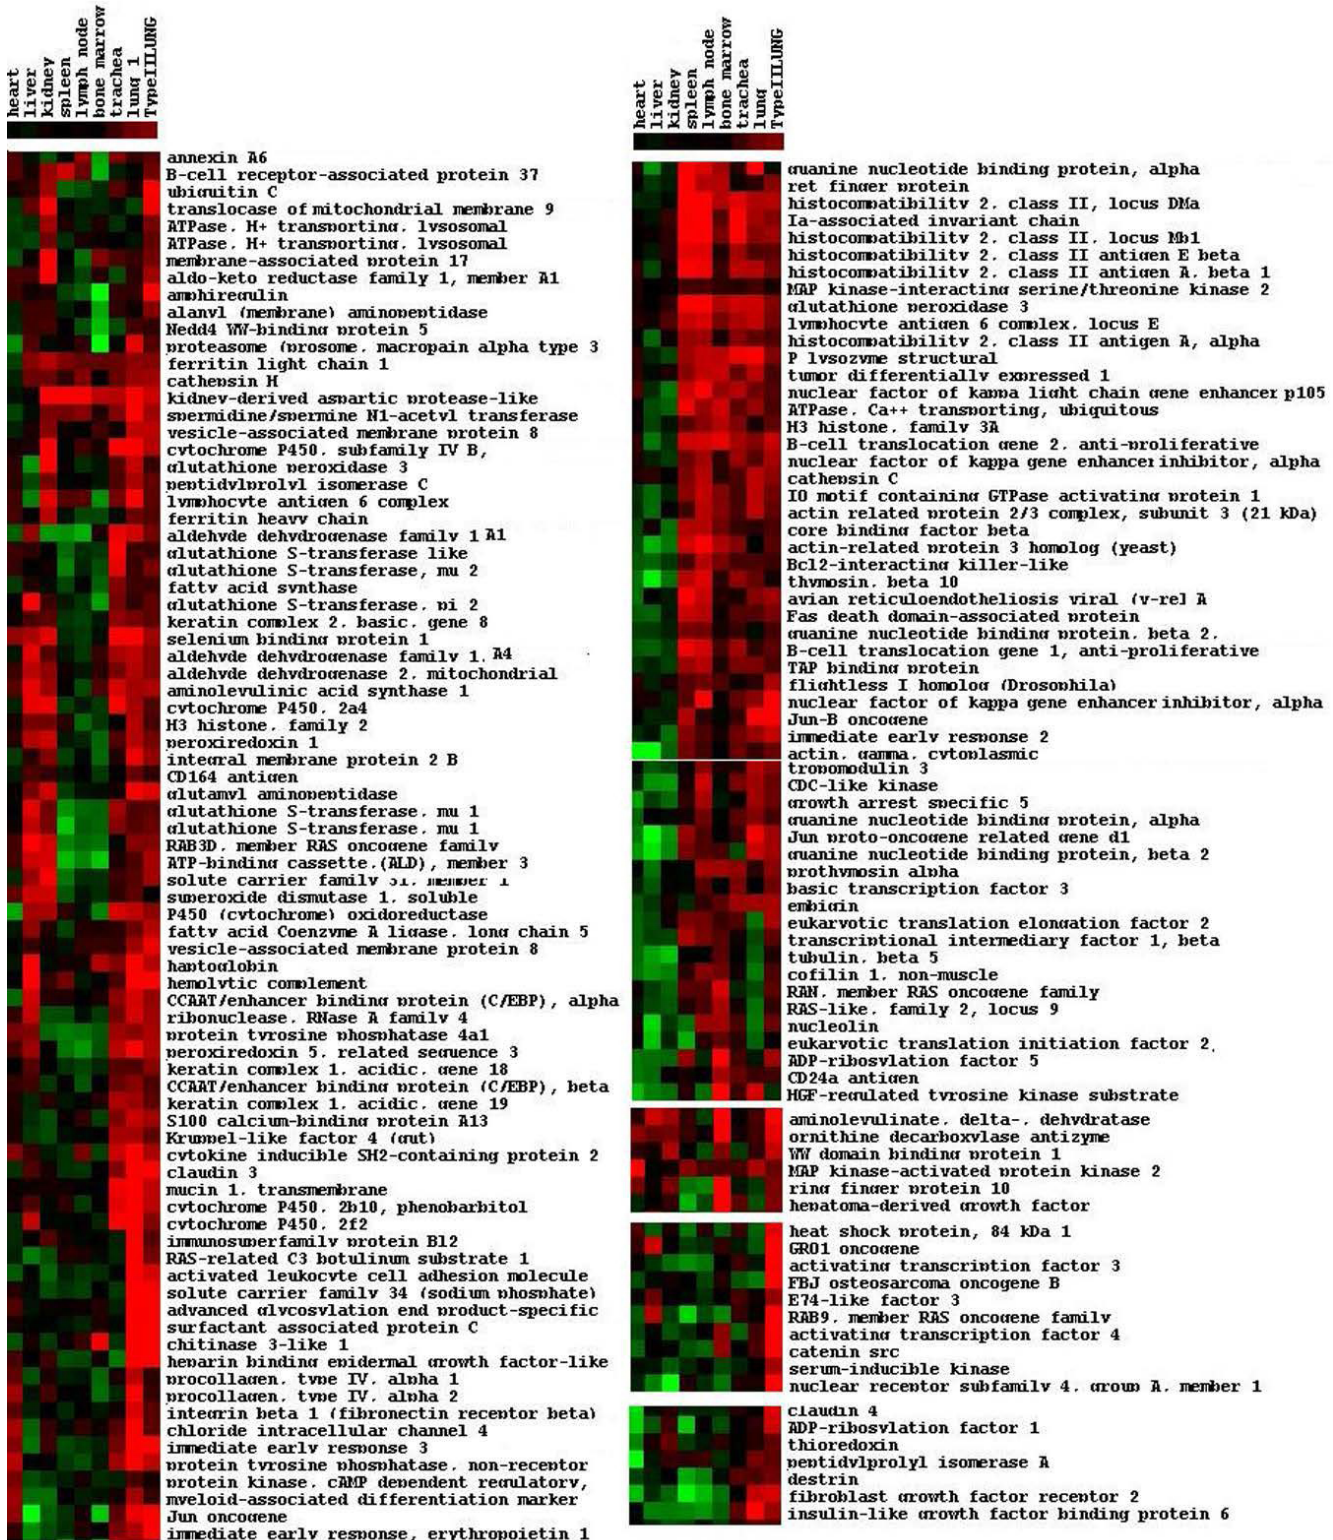

Supplementary Fig. 1. Cluster analysis of gene expression in lung type II cells in comparison with other mouse tissues.
